# Supplementary figures and images for: Elevation of CpG frequencies in influenza A genome attenuates pathogenicity but enhances host response to infection
Source: eLife journal article supplement (doi:10.7554/elife.12735), 2016-02-16

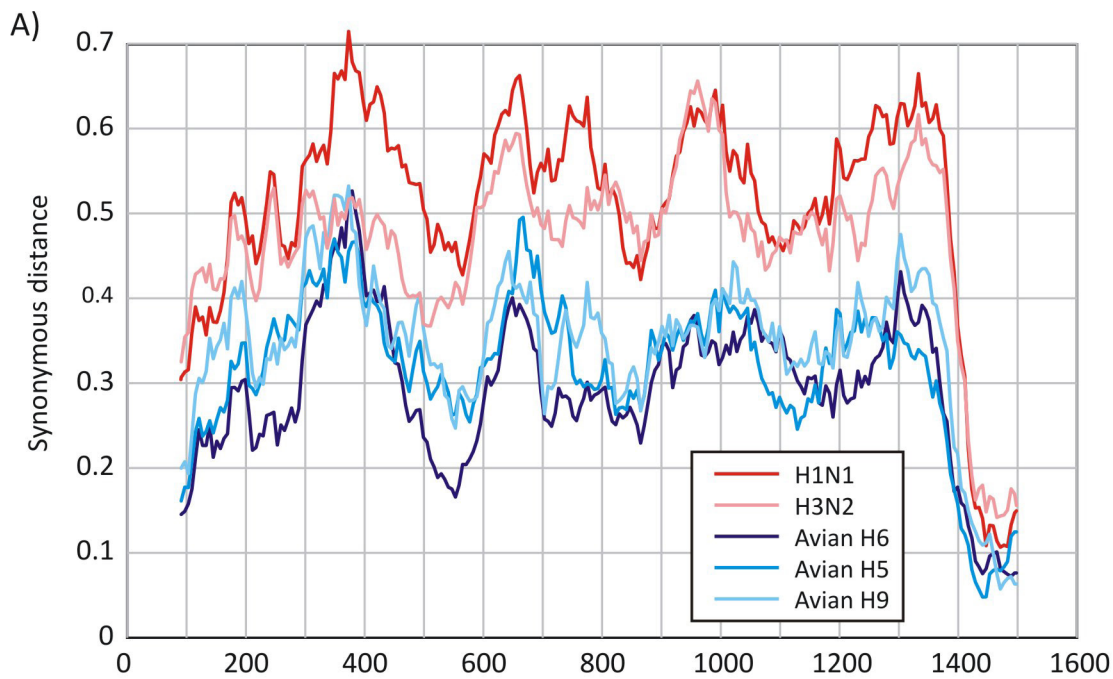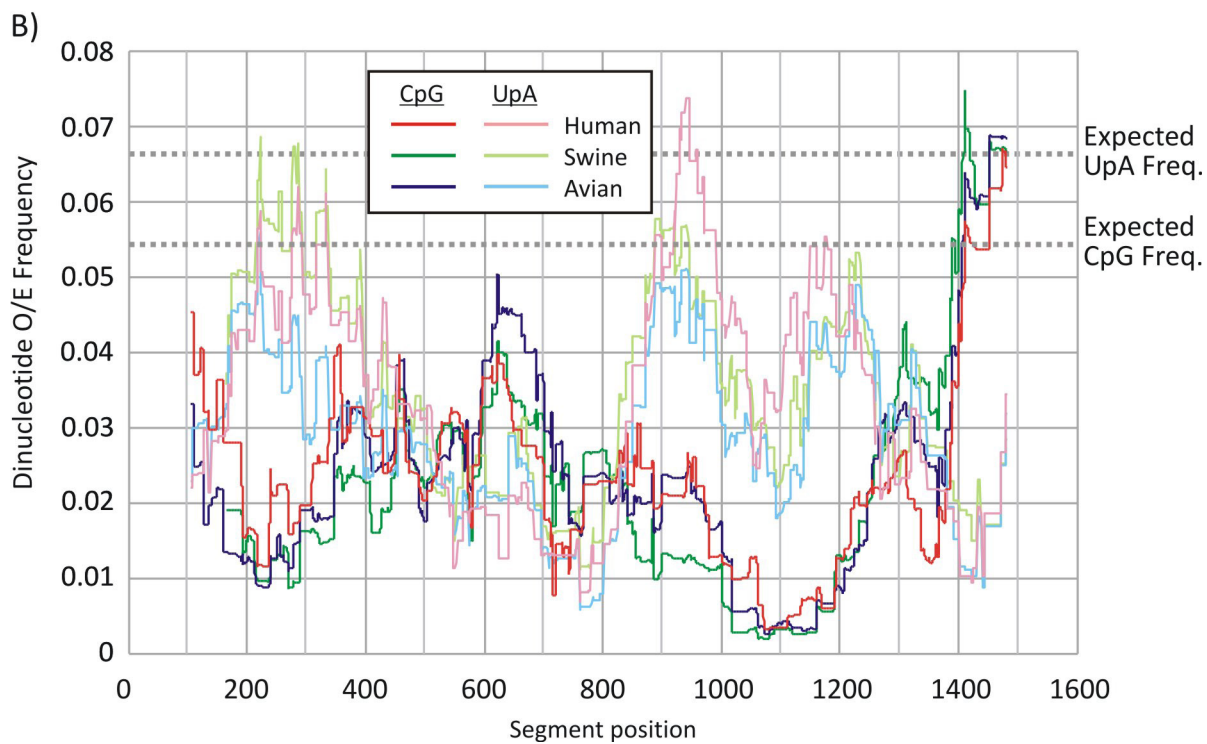

Supplement: supp [file elife_poa_e12735_Figure_1_figure_supplement_1.pdf › elife_poa_e12735_Figure_1_figure_supplement_1.pdf]

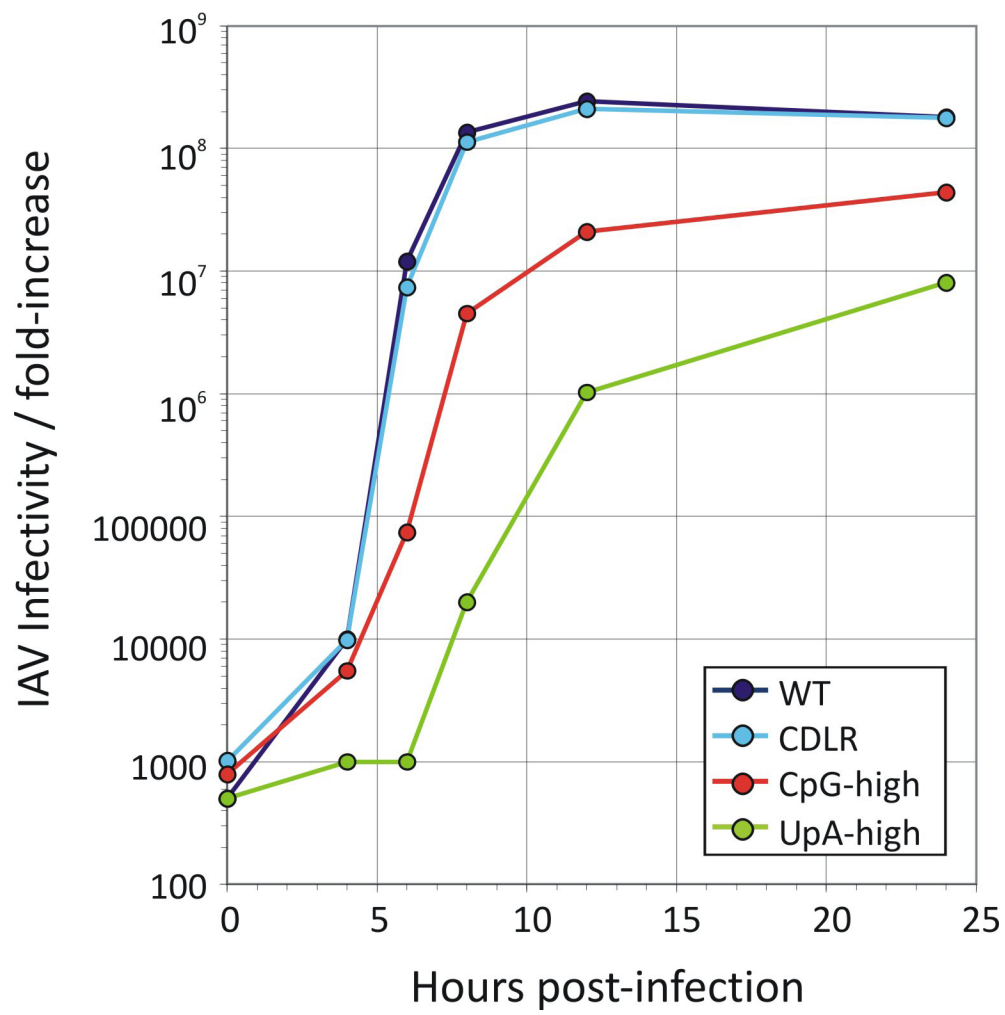

Supplement: supp [file elife_poa_e12735_Figure_1_figure_supplement_2.pdf › elife_poa_e12735_Figure_1_figure_supplement_2.pdf]

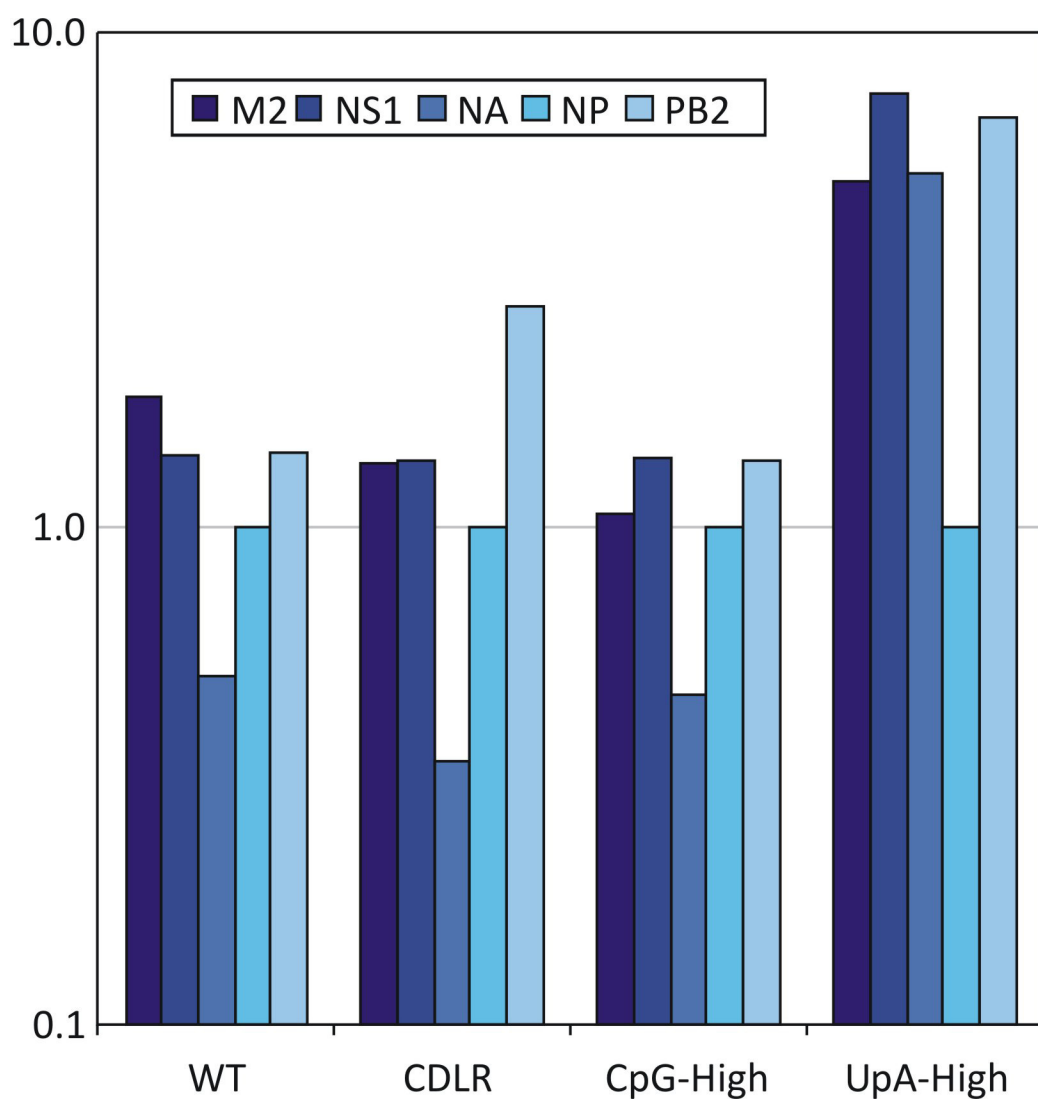

Supplement: supp [file elife_poa_e12735_Figure_1_figure_supplement_3.pdf › elife_poa_e12735_Figure_1_figure_supplement_3.pdf]

A)

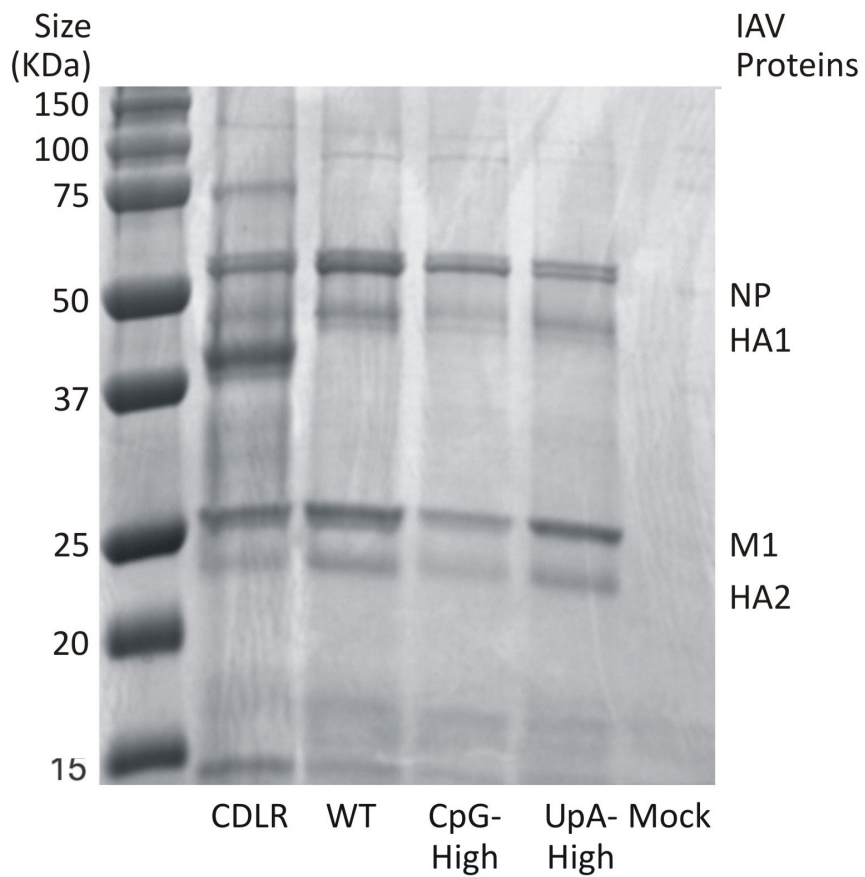

B)

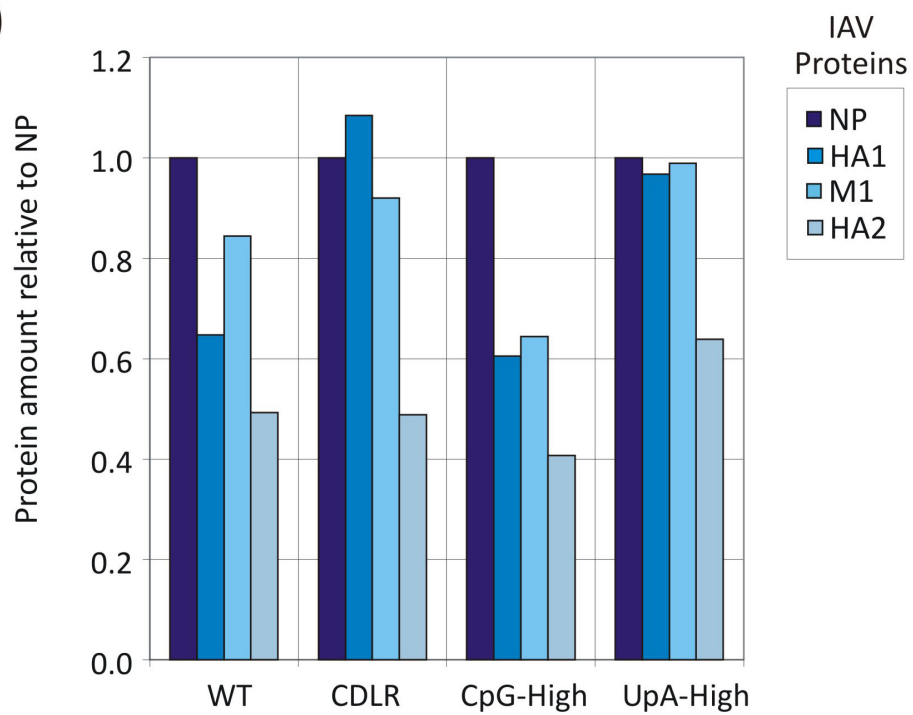

Supplement: supp [file elife_poa_e12735_Figure_1_figure_supplement_4.pdf › elife_poa_e12735_Figure_1_figure_supplement_4.pdf]

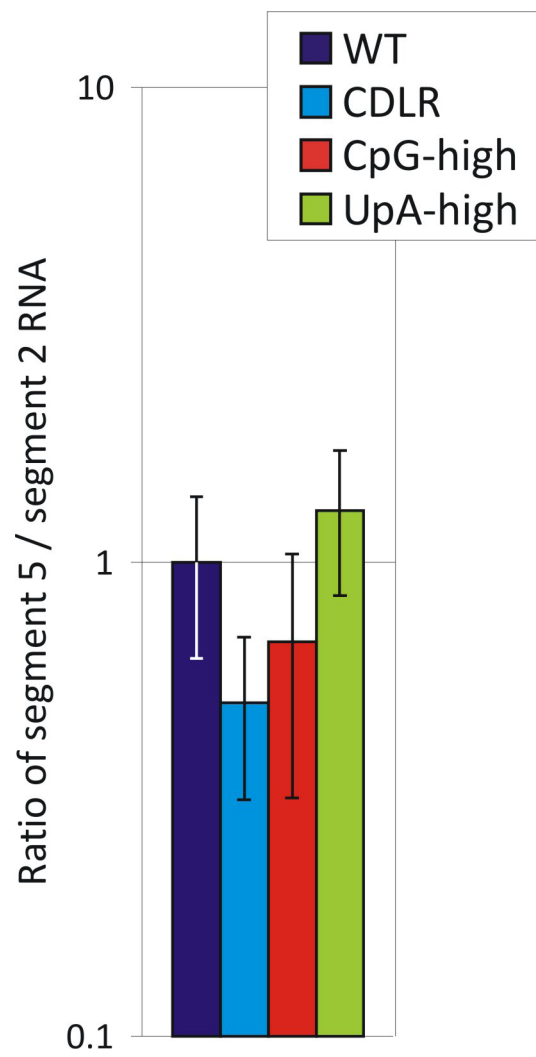

Supplement: supp [file elife_poa_e12735_Figure_1_figure_supplement_5.pdf › elife_poa_e12735_Figure_1_figure_supplement_5.pdf]

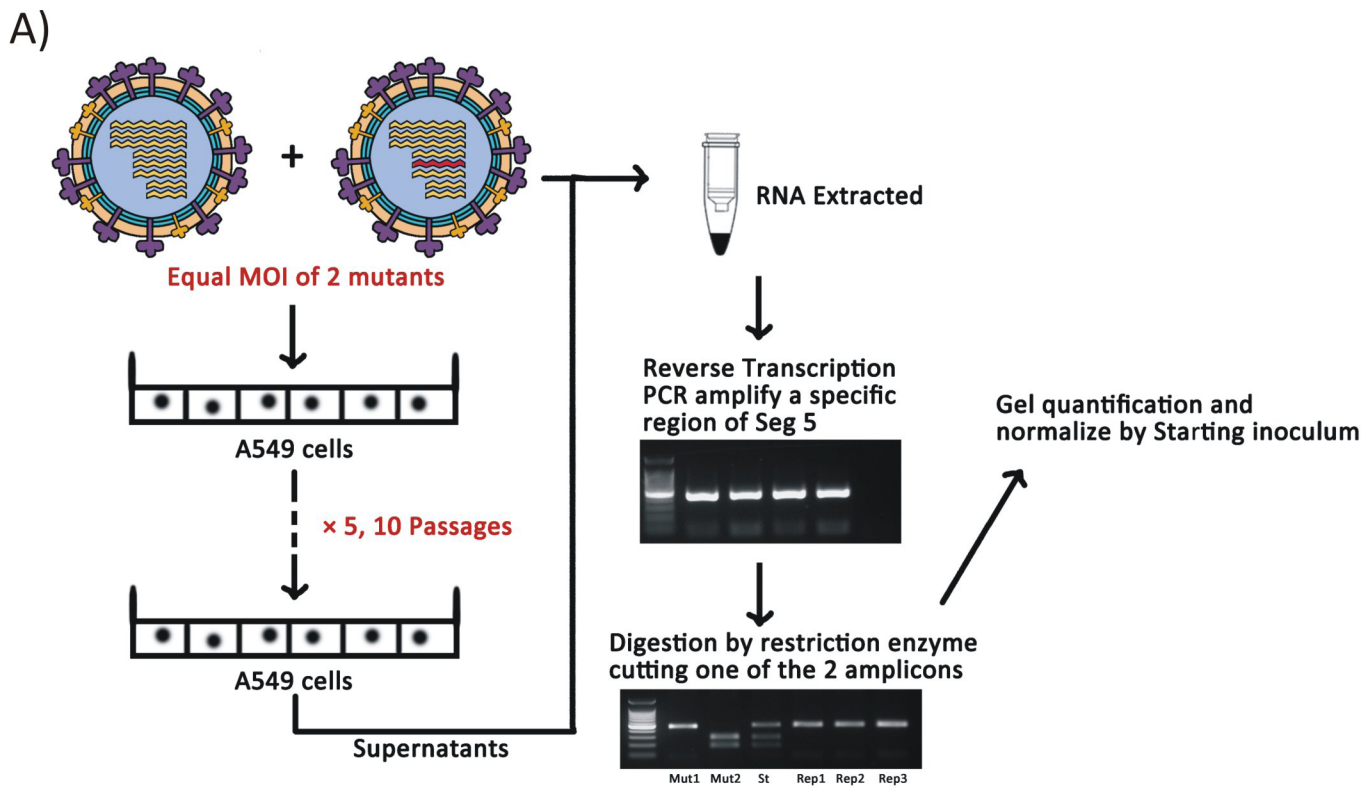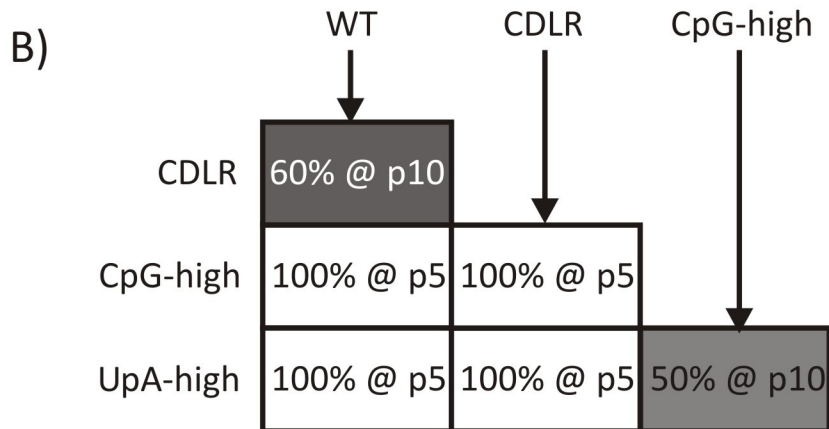

Supplement: supp [file elife_poa_e12735_Figure_1_figure_supplement_6.pdf › elife_poa_e12735_Figure_1_figure_supplement_6.pdf]

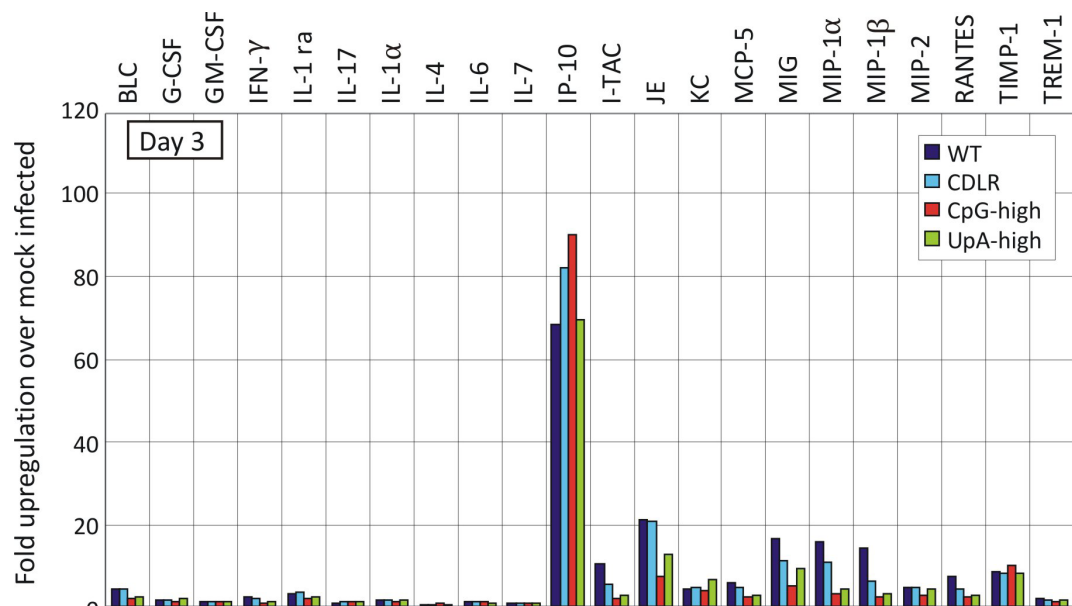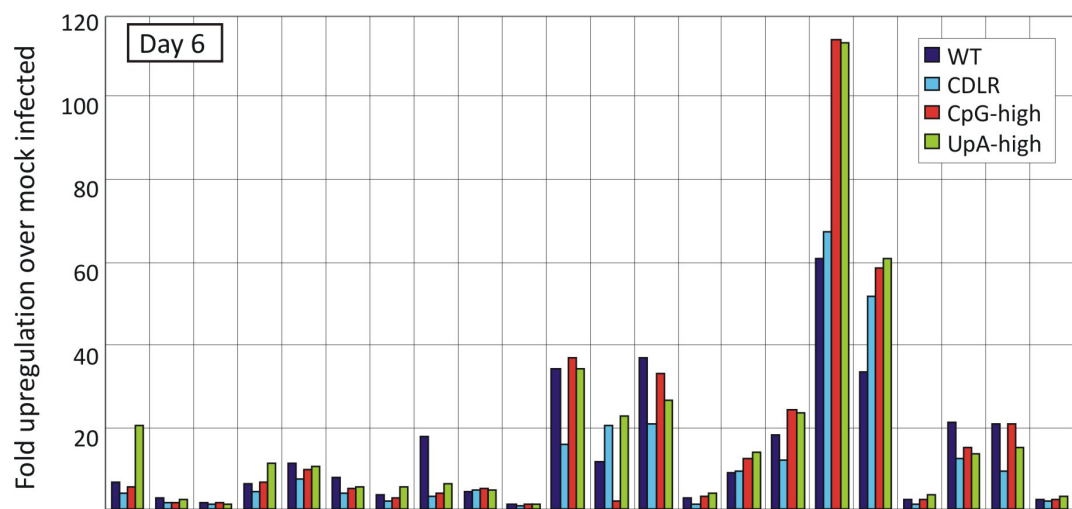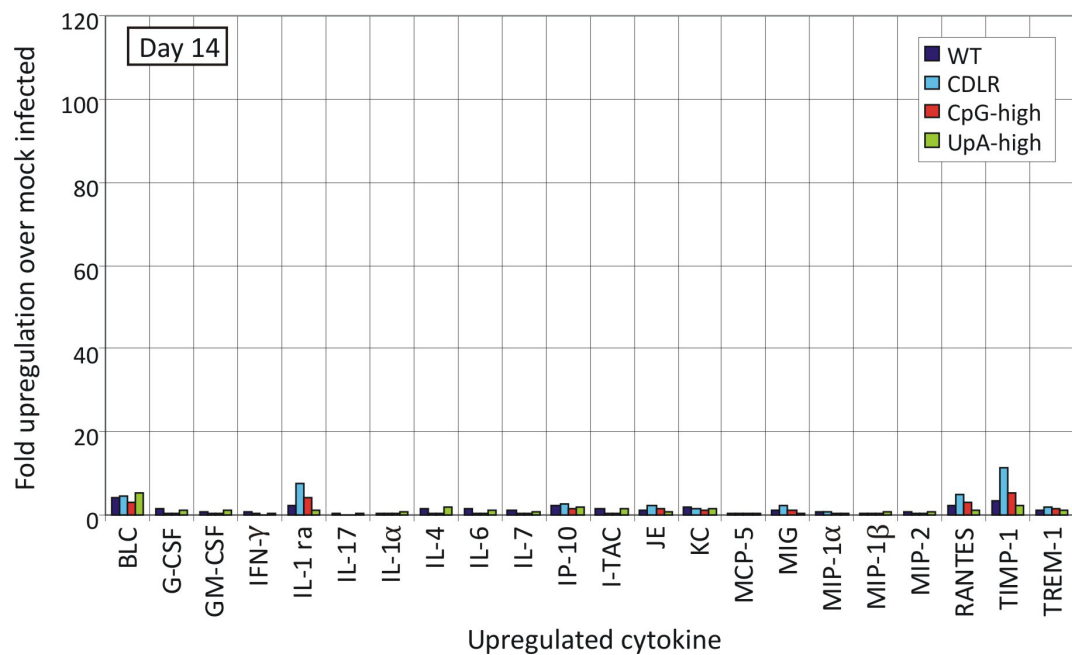

Supplement: supp [file elife_poa_e12735_Figure_3_figure_supplement_1.pdf › elife_poa_e12735_Figure_3_figure_supplement_1.pdf]

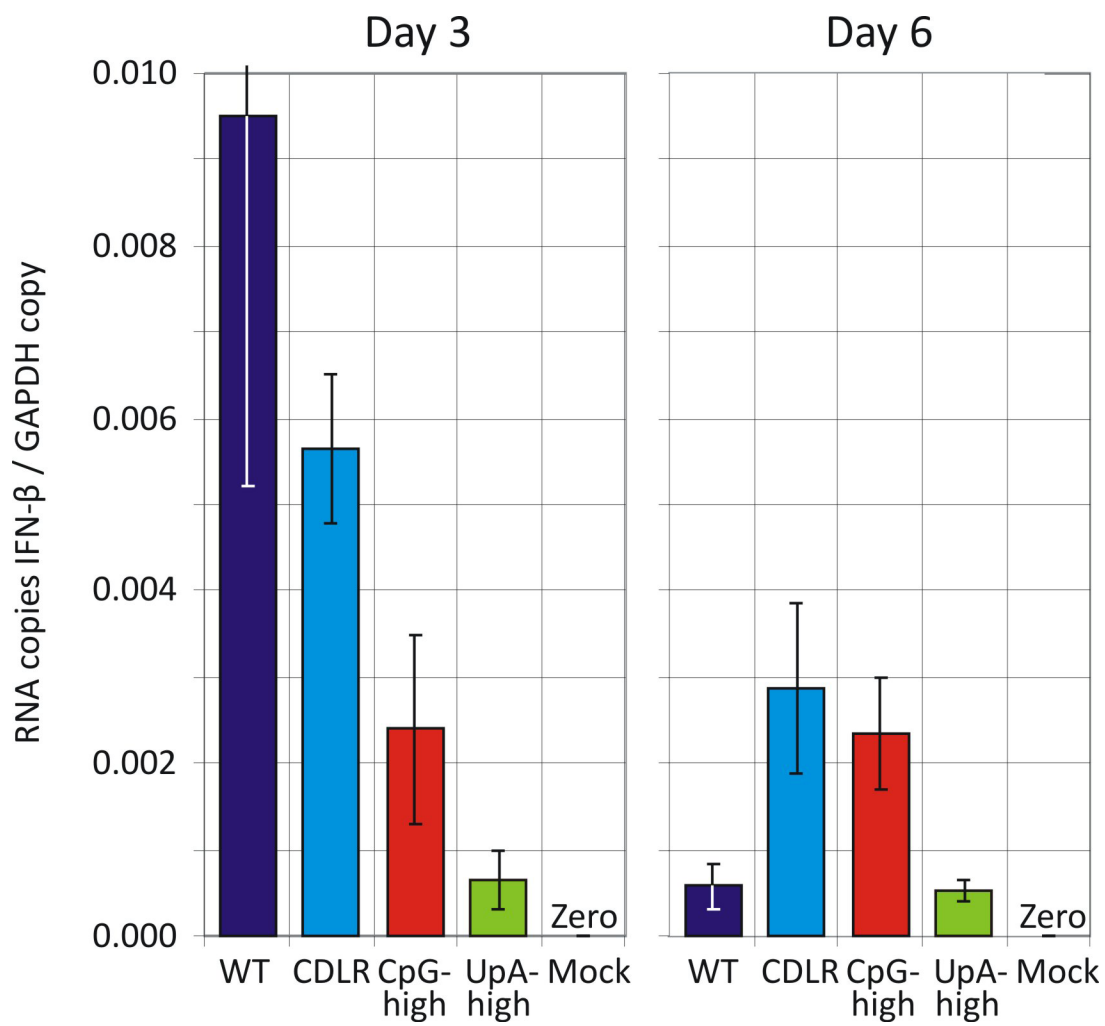

Supplement: supp [file elife_poa_e12735_Figure_3_figure_supplement_2.pdf › elife_poa_e12735_Figure_3_figure_supplement_2.pdf]

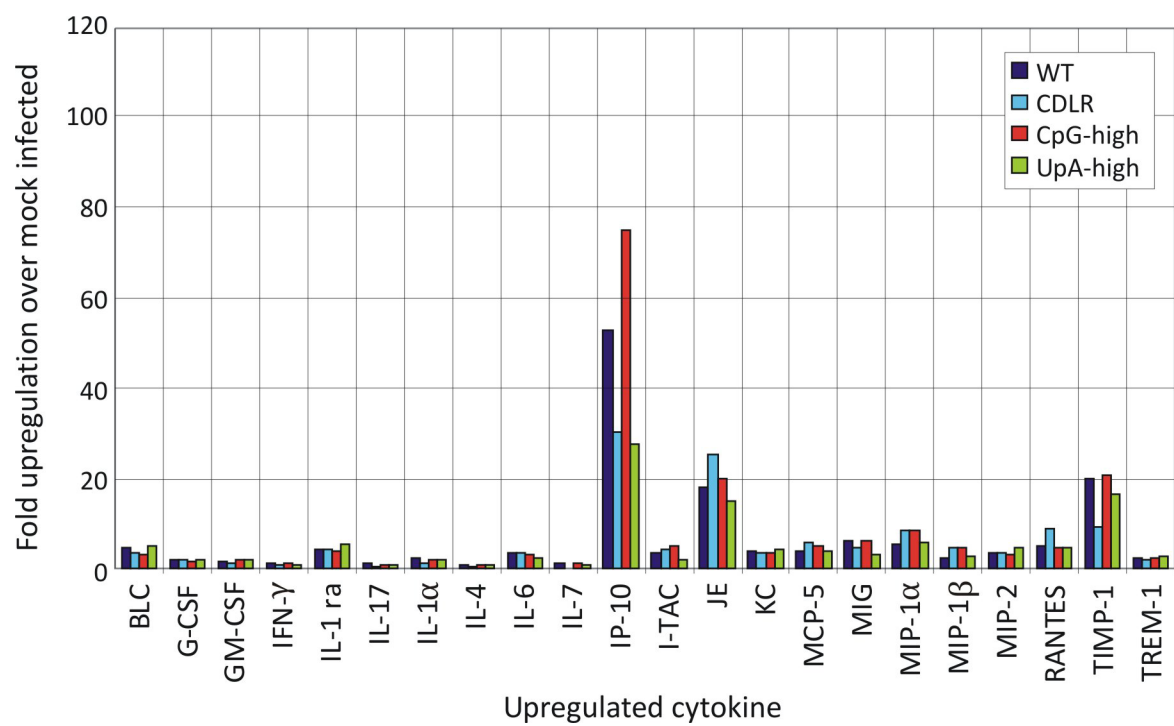

Supplement: supp [file elife_poa_e12735_Figure_3_figure_supplement_3.pdf › elife_poa_e12735_Figure_3_figure_supplement_3.pdf]

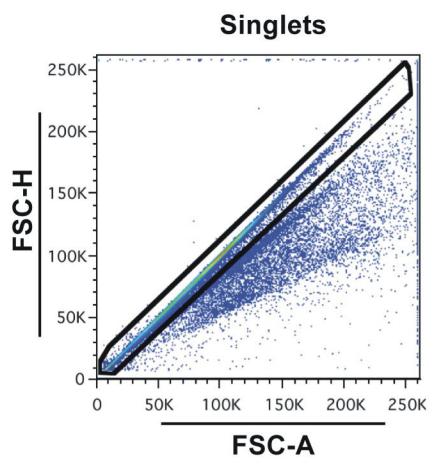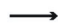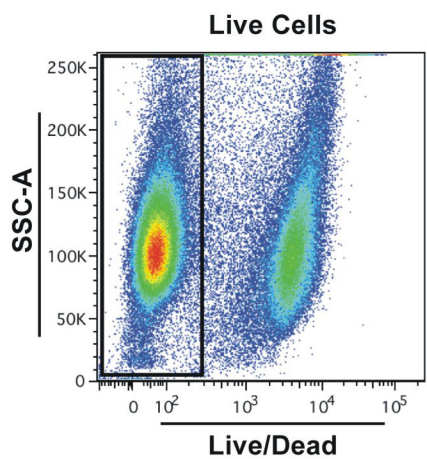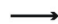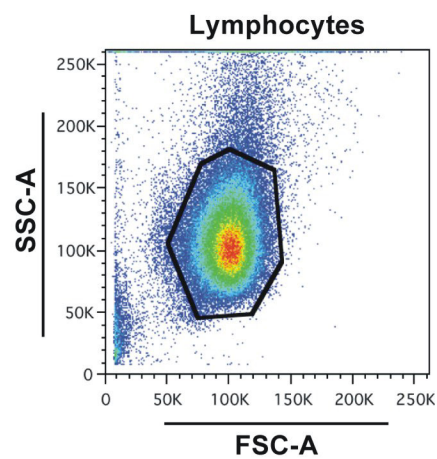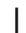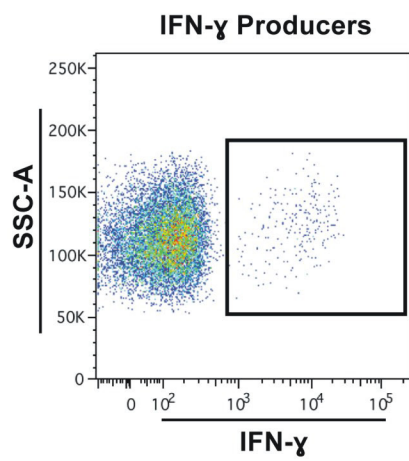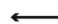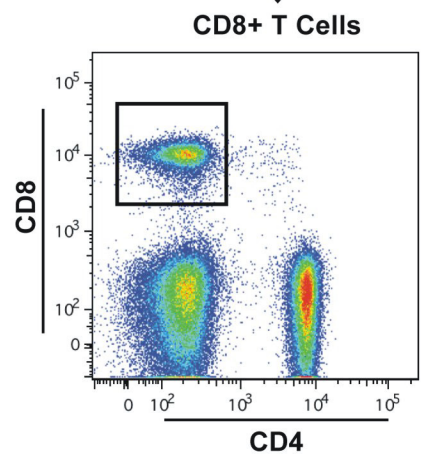

Supplement: supp [file elife_poa_e12735_Figure_4_figure_supplement_1.pdf › elife_poa_e12735_Figure_4_figure_supplement_1.pdf]

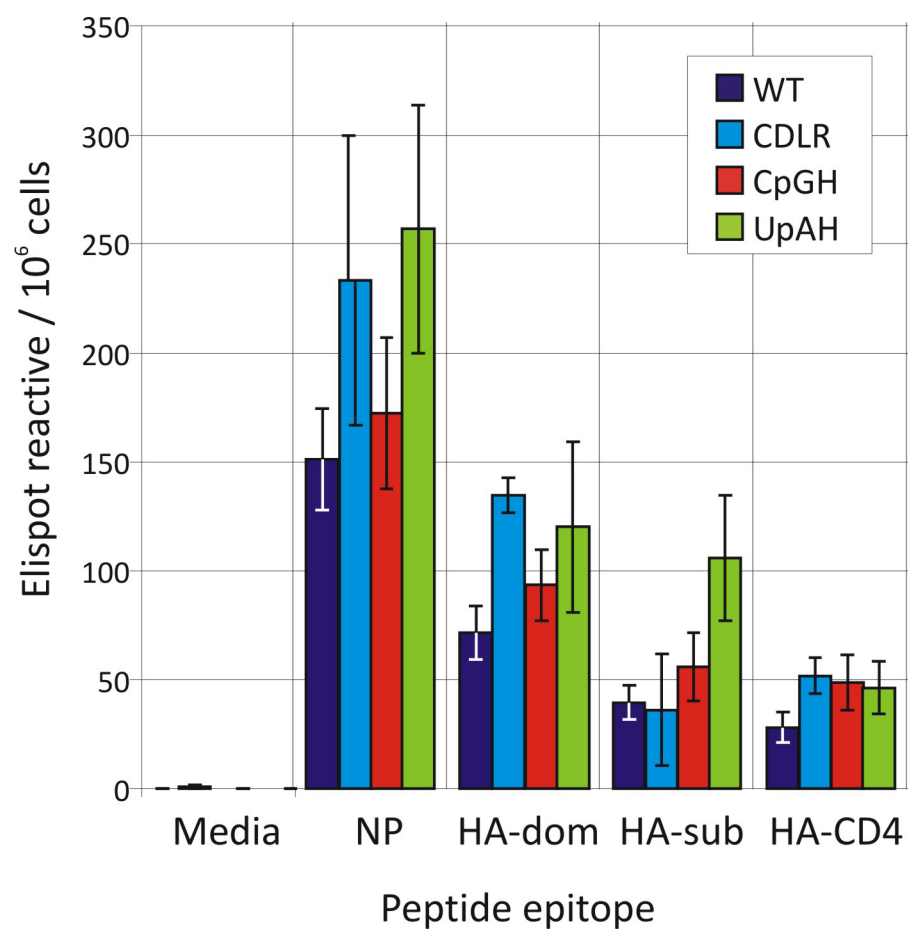

Supplement: supp [file elife_poa_e12735_Figure_4_figure_supplement_2.pdf › elife_poa_e12735_Figure_4_figure_supplement_2.pdf]
